# Supplementary material for: Identification of Altered Proteins in the Plasma of Rats With Chronic Prostatic Inflammation Induced by Estradiol Benzoate and Sex Hormones
Source: PubMed Central journal article supplement — ACS Omega. 2021 May 21;6(22):14361–70. doi: 10.1021/acsomega.1c01191 (PMC8190918; doi:10.1021/acsomega.1c01191), 2021-05-21
Supplement: ao1c01191_si_001.pdf [file ao1c01191_si_001.pdf]

## **Supporting information**

Identification of Altered Proteins in the Plasma of Rats with Chronic Prostatic Inflammation  
Induced by Estradiol Benzoate and Sex Hormones

Zhijun Cao, Daniel T. Sloper<sup>†</sup>, Noriko Nakamura\*

Division of Systems Biology, National Center for Toxicological Research, U.S. Food and Drug  
Administration, Jefferson, AR 72079, USA

<sup>†</sup> Current address: Independent researcher.

**Table S1. Top ten proteins that mostly contribute to component 1 for each time point**

| <b>PND 90</b>                       | <b>PND 100</b>                                            | <b>PND 145</b>                                              | <b>PND 200</b>                                                                                         |
|-------------------------------------|-----------------------------------------------------------|-------------------------------------------------------------|--------------------------------------------------------------------------------------------------------|
| Alpha-2 antiplasmin                 | AP-2 complex subunit beta                                 | Angiotensinogen                                             | Alpha-1-antiproteinase                                                                                 |
|                                     |                                                           |                                                             | Antigen p97 (melanoma associated)<br>identified by monoclonal antibodies<br>133.2 and 96.5 (predicted) |
| Apolipoprotein M                    | ATP synthase subunit alpha,<br>mitochondrial              | Calmodulin-1                                                |                                                                                                        |
|                                     | Biorientation of chromosomes in cell<br>division 1-like 1 | Carboxylic ester hydrolase                                  | Apolipoprotein A-IV                                                                                    |
| Complement C5                       | Complement C3                                             | Carboxypeptidase Q                                          | Carboxypeptidase Q                                                                                     |
| Complement factor D                 | Complement C5                                             | Complement factor H-related protein                         | Hemopexin                                                                                              |
| Fas apoptotic inhibitory molecule 3 | Complement C8 alpha chain                                 | Leukemia inhibitory factor receptor                         | Ig-like domain-containing protein                                                                      |
| Gelsolin                            | Histidine-rich glycoprotein                               | Major urinary protein                                       | Leukemia inhibitory factor receptor                                                                    |
| Globin a4                           | Leukemia inhibitory factor receptor                       | Maltase-glucoamylase                                        | LOC500183 protein                                                                                      |
| Hemoglobin subunit beta-2           | Plasma protease C1 inhibitor                              | Myosin-9                                                    | Proline-rich 32                                                                                        |
| Pentaxin                            |                                                           | Phosphatidylinositol glycan anchor<br>biosynthesis, class A |                                                                                                        |
| Secreted phosphoprotein 24          | Serum paraoxonase/arylesterase 1                          |                                                             | RCG27669                                                                                               |

**Table S2. Ingenuity canonical pathways in rat plasma significantly altered on PND 90, 100, 145, or 200 [-log(p-value)]**

| Ingenuity Canonical Pathways                                           | PND 90 | PND 100 |        | PND 145 |        | PND 200 |        | Identified proteins |
|------------------------------------------------------------------------|--------|---------|--------|---------|--------|---------|--------|---------------------|
|                                                                        |        | EB      | EB+T+E | EB      | EB+T+E | EB      | EB+T+E |                     |
| <b>Significantly altered pathways on PNDs 90, 100, 145, and/or 200</b> |        |         |        |         |        |         |        |                     |
| LXR/RXR activation                                                     | 8.73   | 1.68    | 6      | 8.37    | 12.6   | n.s.    | 15.3   | SERPINF1            |
| FXR/RXR activation                                                     | 8.62   | 1.66    | 5.93   | 10.1    | 14.2   | n.s.    | 15.1   | SERPINF1            |
| Coagulation system                                                     | 7.39   | n.s.    | 3.62   | 3.14    | 4.6    | n.s.    | 4.84   | SERPINF1            |
| Complement system                                                      | 7.29   | n.s.    | 3.57   | 5       | n.s.   | 1.89    | 6.74   | CFB                 |
| Acute phase response signaling                                         | 6.07   | n.s.    | 3.69   | 5.79    | 9.4    | n.s.    | 13.6   | CFB,<br>SERPINF1    |
| Systemic lupus erythematosus signaling                                 | 4.12   | 1.4     | 2.01   | 1.55    | n.s.   | n.s.    | 2.43   |                     |
| Atherosclerosis signaling                                              | 3.56   | 1.65    | 2.51   | 4.9     | 5.72   | n.s.    | 4.59   |                     |
| IL-12 signaling and production in macrophages                          | 3.51   | 1.64    | 2.48   | 4.83    | 5.64   | n.s.    | 4.52   |                     |
| Intrinsic prothrombin activation pathway                               | 3.09   | n.s.    | 1.56   | 1.33    | n.s.   | n.s.    | 2.82   |                     |
| Production of nitric oxide and reactive oxygen species in macrophages  | 3.06   | 1.49    | 2.18   | 4.23    | 4.89   | n.s.    | 3.92   |                     |
| Clathrin-mediated endocytosis signaling                                | 3.03   | 1.47    | 3.6    | 4.19    | 6.19   | n.s.    | 6.67   | AP2B1               |
| Extrinsic prothrombin activation pathway                               | 1.79   | n.s.    | 1.98   | 1.74    | n.s.   | n.s.    | 3.67   |                     |
| Actin cytoskeleton signaling                                           | 1.69   | n.s.    | n.s.   | n.s.    | 1.31   | n.s.    | n.s.   | GSN, MYH9           |
| Iron homeostasis signaling pathway                                     | 2.08   | n.s.    | n.s.   | n.s.    | n.s.   | n.s.    | 5.95   |                     |
| Docosahexaenoic Acid (DHA) signaling                                   | 1.42   | n.s.    | 1.61   | n.s.    | n.s.   | n.s.    | n.s.   | SERPINF1            |
| Xenobiotic metabolism AHR signaling pathway                            | n.s.   | 1.83    | n.s.   | 2.37    | n.s.   | n.s.    | n.s.   |                     |
| <b>Specifically altered pathway on PND 90</b>                          |        |         |        |         |        |         |        |                     |
| Selenocysteine Biosynthesis II (archaea and eukaryotes)                | 2.22   | n.s.    | n.s.   | n.s.    | n.s.   | n.s.    | n.s.   |                     |
| <b>Specifically altered pathway on PND 100</b>                         |        |         |        |         |        |         |        |                     |
| Lipid antigen presentation by CD1                                      | n.s.   | n.s.    | 1.77   | n.s.    | n.s.   | n.s.    | n.s.   | AP2B1               |
| PXR/RXR activation                                                     | n.s.   | n.s.    | 1.38   | n.s.    | n.s.   | n.s.    | n.s.   |                     |
| Glioma invasiveness signaling                                          | n.s.   | n.s.    | 1.32   | n.s.    | n.s.   | n.s.    | n.s.   |                     |
| CNTF signaling                                                         | n.s.   | 2       | n.s.   | n.s.    | n.s.   | n.s.    | n.s.   |                     |
| Mouse embryonic stem cell pluripotency                                 | n.s.   | 1.74    | n.s.   | n.s.    | n.s.   | n.s.    | n.s.   |                     |

|                                                               |      |      |      |      |      |      |      |      |
|---------------------------------------------------------------|------|------|------|------|------|------|------|------|
| Role of NANOG in mammalian embryonic stem cell pluripotency   | n.s. | 1.68 | n.s. | n.s. | n.s. | n.s. | n.s. |      |
| <b>Specifically altered pathway on PND 145</b>                |      |      |      |      |      |      |      |      |
| Maturity onset diabetes of Young (MODY) signaling             | n.s. | n.s. | n.s. | n.s. | 3.92 | n.s. | n.s. |      |
| Cellular effects of sildenafil (Viagra)                       | n.s. | n.s. | n.s. | n.s. | 2.9  | n.s. | n.s. | MYH9 |
| Hepatic fibrosis / hepatic stellate cell activation           | n.s. | n.s. | n.s. | n.s. | 2.47 | n.s. | n.s. | MYH9 |
| MSP-RON signaling pathway                                     | n.s. | n.s. | n.s. | n.s. | 2.4  | n.s. | n.s. |      |
| SPINK1 pancreatic cancer pathway                              | n.s. | n.s. | n.s. | n.s. | 2.37 | n.s. | n.s. |      |
| LPS/IL-1 mediated inhibition of RXR function                  | n.s. | n.s. | n.s. | 3.94 | 2.24 | n.s. | n.s. |      |
| Epithelial Adherens junction signaling                        | n.s. | n.s. | n.s. | n.s. | 1.6  | n.s. | n.s. | MYH9 |
| Tight junction signaling                                      | n.s. | n.s. | n.s. | n.s. | 1.52 | n.s. | n.s. | MYH9 |
| ILK signaling                                                 | n.s. | n.s. | n.s. | n.s. | 1.42 | n.s. | n.s. | MYH9 |
| Agranulocyte adhesion and diapedesis                          | n.s. | n.s. | n.s. | n.s. | 1.41 | n.s. | n.s. | MYH9 |
| Apelin liver signaling pathway                                | n.s. | n.s. | n.s. | n.s. | 1.38 | n.s. | n.s. |      |
| Calcium signaling                                             | n.s. | n.s. | n.s. | n.s. | 1.35 | n.s. | n.s. | MYH9 |
| Arsenate Detoxification I (glutaredoxin)                      | n.s. | n.s. | n.s. | 2.34 | n.s. | n.s. | n.s. |      |
| Ascorbate recycling (cytosolic)                               | n.s. | n.s. | n.s. | 2.34 | n.s. | n.s. | n.s. |      |
| Glutathione-mediated detoxification                           | n.s. | n.s. | n.s. | 1.44 | n.s. | n.s. | n.s. |      |
| nNOS signaling in skeletal muscle cells                       | n.s. | n.s. | n.s. | 1.34 | n.s. | n.s. | n.s. |      |
| NRF2-mediated oxidative stress response                       | n.s. | n.s. | n.s. | 1.71 | n.s. | n.s. | n.s. |      |
| Senescence pathway                                            | n.s. | n.s. | n.s. | 1.41 | n.s. | n.s. | n.s. |      |
| Superoxide radicals degradation                               | n.s. | n.s. | n.s. | 2.04 | n.s. | n.s. | n.s. |      |
| Synaptogenesis signaling pathway                              | n.s. | n.s. | n.s. | 1.31 | n.s. | n.s. | n.s. |      |
| Vitamin-C transport                                           | n.s. | n.s. | n.s. | 1.57 | n.s. | n.s. | n.s. |      |
| Xenobiotic metabolism CAR signaling pathway                   | n.s. | n.s. | n.s. | 1.71 | n.s. | n.s. | n.s. |      |
| Xenobiotic metabolism signaling                               | n.s. | n.s. | n.s. | 1.37 | n.s. | n.s. | n.s. |      |
| <b>Specifically altered pathway on PND 200</b>                |      |      |      |      |      |      |      |      |
| Maturity onset diabetes of Young (MODY) signaling             | n.s. | n.s. | n.s. | n.s. | n.s. | n.s. | 2.53 |      |
| Airway pathology in chronic obstructive pulmonary disease     | n.s. | n.s. | n.s. | n.s. | n.s. | n.s. | 1.95 |      |
| Pyrimidine deoxyribonucleotides <i>de novo</i> Biosynthesis I | n.s. | n.s. | n.s. | n.s. | n.s. | n.s. | 1.53 |      |
| Agrin interactions at neuromuscular junction                  | n.s. | n.s. | n.s. | n.s. | n.s. | 1.57 | n.s. |      |

|                                                                 |      |      |      |      |      |      |      |  |
|-----------------------------------------------------------------|------|------|------|------|------|------|------|--|
| Airway pathology in chronic obstructive pulmonary disease       | n.s. | n.s. | n.s. | n.s. | n.s. | 1.39 | n.s. |  |
| Asparagine Biosynthesis I                                       | n.s. | n.s. | n.s. | n.s. | n.s. | 3.45 | n.s. |  |
| Caveolar-mediated endocytosis signaling                         | n.s. | n.s. | n.s. | n.s. | n.s. | 1.6  | n.s. |  |
| Cellular effects of sildenafil (Viagra)                         | n.s. | n.s. | n.s. | n.s. | n.s. | 1.34 | n.s. |  |
| Crosstalk between dendritic cells and natural killer cells      | n.s. | n.s. | n.s. | n.s. | n.s. | 1.51 | n.s. |  |
| Death receptor signaling                                        | n.s. | n.s. | n.s. | n.s. | n.s. | 1.5  | n.s. |  |
| FAK signaling                                                   | n.s. | n.s. | n.s. | n.s. | n.s. | 1.48 | n.s. |  |
| Fcγ receptor-mediated phagocytosis in macrophages and monocytes | n.s. | n.s. | n.s. | n.s. | n.s. | 1.49 | n.s. |  |
| IGF-1 signaling                                                 | n.s. | n.s. | n.s. | n.s. | n.s. | 1.44 | n.s. |  |
| Mechanisms of viral exit from host cells                        | n.s. | n.s. | n.s. | n.s. | n.s. | 1.84 | n.s. |  |
| MSP-RON signaling pathway                                       | n.s. | n.s. | n.s. | n.s. | n.s. | 1.69 | n.s. |  |
| Paxillin signaling                                              | n.s. | n.s. | n.s. | n.s. | n.s. | 1.43 | n.s. |  |
| Remodeling of epithelial Adherens junctions                     | n.s. | n.s. | n.s. | n.s. | n.s. | 1.63 | n.s. |  |
| RhoA signaling                                                  | n.s. | n.s. | n.s. | n.s. | n.s. | 1.37 | n.s. |  |
| SPINK1 pancreatic cancer pathway                                | n.s. | n.s. | n.s. | n.s. | n.s. | 1.68 | n.s. |  |
| VDR/RXR activation                                              | n.s. | n.s. | n.s. | n.s. | n.s. | 1.57 | n.s. |  |
| VEGF signaling                                                  | n.s. | n.s. | n.s. | n.s. | n.s. | 1.46 | n.s. |  |
| Virus entry via endocytic pathways                              | n.s. | n.s. | n.s. | n.s. | n.s. | 1.43 | n.s. |  |

n.s.: No significances

Table S3. List of quantified proteins in rat plasma in the EB-treated group on PND 90 and the EB and EB+T+E group on PNDs 100, 145, and 200. In column stat\_status 0, 1 and NA indicates no significant change, significant change, or no quantitative comparison for the following comparisons: PND90 EB vs control, PND 100 EB vs control, PND 100 EBTE vs Control, PND 145 EB vs control, PND 145 EBTE vs control, PND 200 EB vs control based on fold change  $\geq 1.5$ ,  $p < 0.05$ , and FDR  $< 0.2$ .

| distinct Protein | differentia leProtein | protein Set | prote protein in_id | description | gene_name                                 | stat_status | PND90 EB-vs.CTRL |         |       | PND100 EB-vs.CTRL |         |       | PND145 EB-vs.CTRL |         |       | PND200 EB-vs.CTRL |         |       |       |        |       |       |        |       |       |       |       |       |       |
|------------------|-----------------------|-------------|---------------------|-------------|-------------------------------------------|-------------|------------------|---------|-------|-------------------|---------|-------|-------------------|---------|-------|-------------------|---------|-------|-------|--------|-------|-------|--------|-------|-------|-------|-------|-------|-------|
|                  |                       |             |                     |             |                                           |             | Ratio            | P Value | FDR   | Ratio             | P Value | FDR   | Ratio             | P Value | FDR   | Ratio             | P Value | FDR   |       |        |       |       |        |       |       |       |       |       |       |
| 1                | 0                     | 481         | P55159              | 544         | Serum paraoxonase/arylesterase 1          | Pon1        | 1111000          | 2.386   | 0.012 | 0.094             | 5.760   | 0.000 | 0.004             | 2.870   | 0.002 | 0.023             | 1.971   | 0.046 | 0.190 | 1.321  | 0.481 | 0.658 | 0.768  | 0.451 | 0.813 | 1.013 | 0.986 | 1.000 |       |
| 0                | 0                     | 213         | P17475              | 531         | Alpha-1-antiprotease                      | Serpina1    | 1011101          | 0.540   | 0.031 | 0.152             | 0.972   | 0.984 | 1.000             | 0.306   | 0.002 | 0.029             | 0.410   | 0.006 | 0.065 | 0.218  | 0.000 | 0.003 | 0.743  | 0.356 | 0.730 | 0.278 | 0.002 | 0.031 |       |
| 0                | 0                     | 345         | P53813              | 309         | Vitamin K-dependent protein 5             | Pros1       | 1011000          | 0.354   | 0.040 | 0.168             | 1.514   | 0.073 | 0.387             | 0.356   | 0.002 | 0.023             | 0.539   | 0.047 | 0.190 | 0.876  | 0.956 | 1.000 | 0.516  | 0.079 | 0.470 | 1.159 | 0.927 | 1.000 |       |
| 0                | 1                     | 63          | AOA096P6i           | 128         | Complement C5                             | C5          | 1010001          | 0.154   | 0.004 | 0.066             | 1.887   | 0.130 | 0.422             | 2.809   | 0.017 | 0.159             | 1.047   | 0.961 | 0.998 | 0.950  | 0.847 | 0.921 | 1.049  | 0.991 | 1.000 | 1.951 | 0.019 | 0.101 |       |
| 1                | 1                     | 369         | F1M4Q1              | 596         | Cylicin_N domain-containing protein       | Cyic2       | 101NANANANA      | 1.996   | 0.007 | 0.070             | 0.530   | 0.166 | 0.468             | 0.143   | 0.002 | 0.023             |         |       |       |        |       |       |        |       |       |       |       |       |       |
| 1                | 1                     | 257         | Q80ZA3              | 331         | Alpha-2 antiplasmin                       | Serpinf1    | 1010000          | 0.066   | 0.000 | 0.000             | 1.553   | 0.019 | 0.214             | 2.262   | 0.000 | 0.008             | 1.115   | 0.825 | 0.998 | 0.488  | 0.153 | 0.330 | 1.042  | 0.803 | 0.963 | 0.738 | 0.860 | 1.000 |       |
| 0                | 1                     | 156         | P20762              | 458         | Ig gamma-2C chain C region                |             | 10010NANA        | 1.626   | 0.013 | 0.094             | 0.382   | 0.458 | 0.741             | 13.462  | 0.154 | 0.604             | 0.070   | 0.022 | 0.124 | 0.350  | 0.937 | 0.991 |        |       |       |       |       |       |       |
| 0                | 0                     | 156         | B1H2A4              | 135         | Pnpt1 protein                             | Pnpt1       | 10010NANA        | 1.626   | 0.013 | 0.094             | 0.382   | 0.129 | 0.422             | 2.200   | 0.479 | 0.948             | 0.246   | 0.007 | 0.065 | 1.234  | 0.739 | 0.848 |        |       |       |       |       |       |       |
| 0                | 0                     | 90          | AOA0G2K9            | 260         | Carboxylic ester hydrolase                | LOC501233   | 1000100          | 0.507   | 0.032 | 0.152             | 0.370   | 0.091 | 0.399             | 0.703   | 0.641 | 0.988             | 0.605   | 0.130 | 0.355 | 0.312  | 0.002 | 0.012 | 0.435  | 0.184 | 0.636 | 0.413 | 0.106 | 0.274 |       |
| 0                | 1                     | 11          | Q91WX0              | 459         | Complement factor H-related protein       |             | 1000100          | 3.477   | 0.019 | 0.105             | 3.100   | 0.170 | 0.469             | 0.512   | 0.213 | 0.608             | 4.095   | 0.216 | 0.479 | 17.103 | 0.001 | 0.007 | 6.183  | 0.030 | 0.277 | 7.310 | 0.067 | 0.198 |       |
| 0                | 0                     | 217         | Q64268              | 361         | Heparin cofactor 2                        | Serpind1    | 1000100          | 4.183   | 0.008 | 0.072             | 0.591   | 0.157 | 0.458             | 0.711   | 0.987 | 1.000             | 1.301   | 0.290 | 0.569 | 0.416  | 0.002 | 0.014 | 1.675  | 0.531 | 0.841 | 0.673 | 0.439 | 0.696 |       |
| 0                | 0                     | 6           | Q5M7V3              | 290         | LOC367586 protein                         | LOC367586   | 1000100          | 3.432   | 0.036 | 0.154             | 0.593   | 0.263 | 0.586             | 1.856   | 0.200 | 0.608             | 0.576   | 0.114 | 0.326 | 4.044  | 0.003 | 0.016 | 0.778  | 0.949 | 1.000 | 3.078 | 0.155 | 0.356 |       |
| 0                | 0                     | 54          | AOA0G2J5i           | 115         | Globin a4                                 | Hbb         | 100NANA01        | 0.009   | 0.000 | 0.000             | 0.351   | 0.076 | 0.387             | 0.804   | 0.996 | 1.000             |         |       |       |        |       |       |        |       |       |       |       |       |       |
| 0                | 1                     | 2           | D4ADK7              | 58          | Antigen p97 (Melanoma associated) ident   | Melft       | 1000001          | 0.626   | 0.048 | 0.199             | 0.879   | 0.843 | 1.000             | 0.850   | 0.633 | 0.988             | 0.809   | 0.901 | 0.998 | 0.606  | 0.231 | 0.431 | 0.701  | 0.219 | 0.648 | 0.255 | 0.000 | 0.027 |       |
| 0                | 0                     | 26          | Q62930              | 157         | Complement component C9                   | C9          | 1000001          | 2.856   | 0.034 | 0.154             | 19.443  | 0.306 | 0.616             | 14.074  | 0.565 | 0.962             | 0.964   | 0.916 | 0.998 | 1.361  | 0.438 | 0.637 | 0.395  | 0.032 | 0.279 | 0.305 | 0.022 | 0.105 |       |
| 0                | 1                     | 19          | AOA0G2J5i           | 329         | Globin c2                                 | Hba-a2      | 1000001          | 0.109   | 0.006 | 0.070             | 0.239   | 0.148 | 0.447             | 0.248   | 0.045 | 0.274             | 0.750   | 0.577 | 0.856 | 0.411  | 0.293 | 0.483 | 1.110  | 0.768 | 0.963 | 0.021 | 0.032 | 0.119 |       |
| 0                | 1                     | 19          | P01946              | 30          | Hemoglobin subunit alpha-1/2              | Hba1        | 1000001          | 0.108   | 0.006 | 0.070             | 0.249   | 0.141 | 0.438             | 0.228   | 0.041 | 0.270             | 0.750   | 0.577 | 0.856 | 0.411  | 0.293 | 0.483 | 1.031  | 0.756 | 0.963 | 0.020 | 0.032 | 0.119 |       |
| 0                | 0                     | 174         | Q5M871              | 414         | Fas apoptotic inhibitory molecule 3       | Fcmr        | 1NANANANANANA    | 0.325   | 0.003 | 0.049             |         |       |                   |         |       |                   |         |       |       |        |       |       |        |       |       |       |       |       |       |
| 0                | 0                     | 199         | Q5UDQ9              | 653         | Liprin beta 2                             |             | 1NANANANANANA    | 0.185   | 0.019 | 0.105             |         |       |                   |         |       |                   |         |       |       |        |       |       |        |       |       |       |       |       |       |
| 1                | 1                     | 248         | D3E3E5              | 577         | Phosphoseryl-tRNA kinase                  | Pstk        | 1NANANANANANA    | 0.075   | 0.014 | 0.094             |         |       |                   |         |       |                   |         |       |       |        |       |       |        |       |       |       |       |       |       |
| 0                | 0                     | 177         | AOA0G2K9            | 423         | Secreted phosphoprotein 24                | Spp2        | 1NANANANANANA    | 4.027   | 0.001 | 0.035             |         |       |                   |         |       |                   |         |       |       |        |       |       |        |       |       |       |       |       |       |
| 0                | 1                     | 54          | P11517              | 139         | Hemoglobin subunit beta-2                 |             | 100NANANANA      | 0.278   | 0.004 | 0.062             | 0.189   | 0.512 | 0.774             | 1.067   | 0.355 | 0.863             |         |       |       |        |       |       |        |       |       |       |       |       |       |
| 0                | 0                     | 289         | G3V7N9              | 296         | Adiponectin a                             | C1qb        | 10000NANA        | 2.159   | 0.020 | 0.106             | 1.029   | 0.679 | 0.914             | 3.340   | 0.405 | 0.274             | 0.644   | 0.293 | 0.569 | 1.571  | 0.639 | 0.776 |        |       |       |       |       |       |       |
| 1                | 1                     | 269         | P14630              | 185         | Apolipoprotein M                          | Apom        | 1000000          | 0.305   | 0.000 | 0.014             | 0.665   | 0.491 | 0.756             | 0.629   | 0.480 | 0.948             | 1.823   | 0.055 | 0.208 | 1.777  | 0.058 | 0.168 | 1.377  | 0.408 | 0.767 | 2.518 | 0.077 | 0.213 |       |
| 0                | 1                     | 354         | Q811M5              | 207         | Complement component C6                   | C6          | 1000000          | 2.651   | 0.019 | 0.105             | 3.256   | 0.081 | 0.387             | 2.126   | 0.201 | 0.608             | 0.412   | 0.093 | 0.307 | 1.634  | 0.940 | 0.991 | 0.366  | 0.482 | 0.817 | 1.793 | 0.312 | 0.574 |       |
| 0                | 0                     | 11          | F1M983              | 315         | Complement factor H                       | Cfh         | 1000000          | 0.528   | 0.036 | 0.154             | 0.793   | 0.550 | 0.808             | 0.977   | 0.984 | 1.000             | 0.644   | 0.712 | 0.940 | 1.260  | 0.448 | 0.642 | 0.939  | 0.983 | 1.000 | 1.433 | 0.287 | 0.550 |       |
| 0                | 1                     | 429         | Q68FP1              | 60          | Gelsolin                                  | Gsn         | 1000000          | 0.456   | 0.001 | 0.035             | 1.205   | 0.709 | 0.940             | 1.015   | 0.999 | 1.000             | 0.743   | 0.383 | 0.674 | 0.803  | 0.516 | 0.678 | 0.925  | 0.857 | 0.963 | 1.163 | 0.752 | 1.000 |       |
| 0                | 1                     | 46          | P08934              | 438         | Kinogen-1                                 | Kng1        | 1000000          | 0.568   | 0.005 | 0.066             | 1.975   | 0.459 | 0.741             | 2.376   | 0.141 | 0.591             | 0.956   | 0.991 | 0.998 | 1.158  | 0.721 | 0.841 | 0.847  | 0.841 | 0.847 | 0.524 | 0.945 | 0.965 | 1.000 |
| 0                | 1                     | 46          | Q5M8A0              | 480         | Kng2 protein                              | Kng2l1      | 1000000          | 0.492   | 0.014 | 0.094             | 2.752   | 0.419 | 0.728             | 3.019   | 0.183 | 0.608             | 1.055   | 0.948 | 0.998 | 1.301  | 0.552 | 0.700 | 0.962  | 0.984 | 1.000 | 1.036 | 0.904 | 1.000 |       |
| 0                | 0                     | 3           | H6X2X0              | 84          | Pentaxin                                  | crp         | 1000000          | 0.561   | 0.002 | 0.049             | 2.222   | 0.663 | 0.914             | 0.862   | 0.617 | 0.988             | 1.644   | 0.148 | 0.370 | 1.994  | 0.106 | 0.273 | 0.760  | 0.402 | 0.767 | 0.869 | 0.971 | 1.000 |       |
| 0                | 0                     | 144         | P23680              | 322         | Serum amyloid P-component                 | Apcs        | 1000000          | 3.955   | 0.026 | 0.133             | 0.181   | 0.371 | 0.680             | 0.318   | 0.686 | 1.000             | 0.852   | 0.866 | 0.998 | 1.607  | 0.305 | 0.499 | 1.629  | 0.062 | 0.430 | 1.131 | 0.706 | 0.970 |       |
| 0                | 0                     | 95          | AOA0G2K2            | 1091        | Tropomyosin alpha-4 chain                 | Tpm4        | 1000000          | 0.213   | 0.015 | 0.096             | 1.012   | 0.777 | 0.993             | 0.837   | 0.716 | 1.000             | 0.417   | 0.102 | 0.312 | 0.514  | 0.119 | 0.282 | 0.628  | 0.123 | 0.580 | 0.661 | 0.149 | 0.354 |       |
| 0                | 0                     | 63          | P08650              | 66          | Complement C5                             | C5          | NA110001         | 1.822   | 0.001 | 0.042             | 2.566   | 0.000 | 0.007             | 0.823   | 0.740 | 0.952             | 1.084   | 0.889 | 0.949 | 1.029  | 0.958 | 0.781 | 0.963  | 1.818 | 0.023 | 0.109 |       |       |       |
| 1                | 1                     | 398         | M0RC54              | 398         | Biorientation of chromosomes in cell divi | Bod1l1      | NA1100NANA       | 2.660   | 0.001 | 0.042             | 3.281   | 0.000 | 0.008             | 1.140   | 0.480 | 0.778             | 0.956   | 0.995 | 1.000 |        |       |       |        |       |       |       |       |       |       |
| 0                | 0                     | 37          | G3V7K2              | 684         | Leukemia inhibitory factor receptor       | Lifr        | NA100101         | 6.480   | 0.001 | 0.042             | 2.791   | 0.036 | 0.254             | 1.132   | 0.956 | 0.998             | 28.037  | 0.001 | 0.009 | 1.881  | 0.231 | 0.651 | 12.611 | 0.001 | 0.031 |       |       |       |       |
| 1                | 1                     | 302         | D3Z5G2              | 393         | Tetratricopeptide repeat and ankyrin rep  | Trank1      | NA011100         | 0.946   | 0.960 | 1.000             | 0.391   | 0.000 | 0.008             | 1.616   | 0.003 | 0.053             | 0.595   | 0.003 | 0.015 | 1.274  | 0.506 | 0.833 | 1.079  | 0.999 | 1.000 |       |       |       |       |
| 1                | 1                     | 167         | Q9QYJ4              | 395         | ATP-binding cassette sub-family B membe   | Abcb9       | 0011100          | 1.596   | 0.089 | 0.246             | 1.279   | 0.920 | 1.000             | 0.250   | 0.011 | 0.023             | 3.629   | 0.010 | 0.083 | 4.408  | 0.017 | 0.061 | 1.958  | 0.851 | 0.963 | 0.947 | 0.863 | 1.000 |       |
| 1                | 1                     | 205         | D3ZWD6              | 513         | Complement C8 alpha chain                 | C8a         | 0011000          | 0.518   | 0.133 | 0.329             | 4.099   | 0.019 | 0.214             | 3.905   | 0.011 | 0.117             | 1.894   | 0.023 | 0.124 | 1.076  | 0.704 | 0.833 | 1.258  | 0.279 | 0.681 | 1.566 | 0.700 | 0.203 |       |
| 0                | 0                     | 120         | AOA0G2K9            | 262         | Histidine-rich glycoprotein               | Hrg         | 0010100          | 2.864   | 0.052 | 0.205             | 0.210   | 0.010 | 0.214             | 0.249   | 0.020 | 0.175             | 1.312   | 0.464 | 0.766 | 0.518  | 0.019 | 0.068 | 0.901  | 0.847 | 0.963 | 1.077 | 0.875 | 1.000 |       |
| 0                | 0                     | 204         | P62944              | 512         | AP-2 complex subunit beta                 | Ap2b1       | NA01NANANANA     | 5.323   | 0.028 | 0.240             | 7.625   | 0.006 | 0.069             |         |       |                   |         |       |       |        |       |       |        |       |       |       |       |       |       |
| 1                | 1                     | 230         | D4A1D3              | 18          | Sacsin molecular chaperone                | Sacs        | NA0100NANA       | 0.800   | 0.435 | 0.728             | 0.226   | 0.000 | 0.008             | 1.632   | 0.951 | 0.998             | 0.536   | 0.440 | 0.637 | </     |       |       |        |       |       |       |       |       |       |

|   |   |     |           |      |                                                  |            |              |       |       |       |        |       |       |        |       |       |       |       |       |        |       |       |       |       |       |        |       |       |
|---|---|-----|-----------|------|--------------------------------------------------|------------|--------------|-------|-------|-------|--------|-------|-------|--------|-------|-------|-------|-------|-------|--------|-------|-------|-------|-------|-------|--------|-------|-------|
| 0 | 0 | 1   | Q7TPI9    | 413  | Ac2-248                                          |            | 0001001      | 0.944 | 0.561 | 0.739 | 1.328  | 0.653 | 0.914 | 2.264  | 0.340 | 0.841 | 1.772 | 0.000 | 0.009 | 1.007  | 0.999 | 1.000 | 0.693 | 0.360 | 0.730 | 0.469  | 0.032 | 0.119 |
| 1 | 1 | 293 | F7FA5Y    | 313  | Similar to alpha-fetoprotein                     | LOC360919  | 0001001      | 1.302 | 0.014 | 0.094 | 0.779  | 0.322 | 0.620 | 1.609  | 0.107 | 0.475 | 0.568 | 0.004 | 0.056 | 1.147  | 0.544 | 0.695 | 1.178 | 0.539 | 0.841 | 1.607  | 0.020 | 0.102 |
| 1 | 1 | 311 | P55314    | 415  | Complement component C8 beta chain               | C8b        | 0001000      | 4.832 | 0.344 | 0.550 | 0.422  | 0.620 | 0.895 | 0.755  | 0.928 | 1.000 | 6.953 | 0.003 | 0.053 | 1.389  | 0.785 | 0.892 | 2.445 | 0.461 | 0.813 | 1.995  | 0.960 | 1.000 |
| 0 | 1 | 1   | P31211    | 1    | Corticosteroid-binding globulin                  | Serpin6    | 0001000      | 1.574 | 0.088 | 0.246 | 1.122  | 0.955 | 1.000 | 0.825  | 0.992 | 1.000 | 2.666 | 0.000 | 0.008 | 1.351  | 0.127 | 0.292 | 2.028 | 0.809 | 0.963 | 1.042  | 0.995 | 1.000 |
| 1 | 1 | 475 | Q08420    | 451  | Extracellular superoxide dismutase [Cu-Zn SOD3]  |            | 0001000      | 1.758 | 0.057 | 0.208 | 0.720  | 0.655 | 0.914 | 1.588  | 0.524 | 0.962 | 0.365 | 0.032 | 0.145 | 0.632  | 0.330 | 0.534 | 0.566 | 0.809 | 0.963 | 0.591  | 0.833 | 1.000 |
| 0 | 0 | 310 | AOA096MJ  | 517  | Glutathione S-transferase omega 1, isoform Gsto1 |            | 0001000      | 0.942 | 0.545 | 0.209 | 0.741  | 0.153 | 0.453 | 1.545  | 0.091 | 0.475 | 1.799 | 0.200 | 0.124 | 1.018  | 0.989 | 1.000 | 1.098 | 0.680 | 0.963 | 1.161  | 0.587 | 0.854 |
| 1 | 1 | 457 | D4A0W2    | 327  | Lysozyme f1                                      | RGD1306474 | 0001000      | 1.047 | 0.602 | 0.757 | 0.373  | 0.040 | 0.265 | 0.613  | 0.491 | 0.948 | 0.419 | 0.047 | 0.190 | 0.384  | 0.112 | 0.281 | 0.551 | 0.748 | 0.963 | 0.583  | 0.694 | 0.964 |
| 0 | 0 | 171 | Q5M878    | 410  | Serum amyloid A protein                          | Saa4       | 0001000      | 0.808 | 0.593 | 0.757 | 0.985  | 0.868 | 1.000 | 1.222  | 0.808 | 1.000 | 0.614 | 0.021 | 0.124 | 1.376  | 0.172 | 0.353 | 0.687 | 0.241 | 0.651 | 1.138  | 0.968 | 1.000 |
| 1 | 1 | 262 | D3ZTX4    | 175  | Maltase-glucoamylase                             | Mgam       | NANANA0111   |       |       |       |        |       |       |        |       |       | 0.994 | 0.945 | 0.998 | 0.440  | 0.000 | 0.001 | 4.959 | 0.009 | 0.189 | 8.022  | 0.003 | 0.035 |
| 0 | 0 | 103 | P63259    | 299  | Actin, cytoplasmic 2                             | Actg1      | 0000111      | 1.481 | 0.129 | 0.324 | 0.856  | 0.855 | 1.000 | 0.806  | 0.988 | 1.000 | 0.716 | 0.937 | 0.998 | 5.320  | 0.025 | 0.086 | 0.536 | 0.014 | 0.197 | 0.513  | 0.012 | 0.083 |
| 0 | 0 | 455 | AOA0G2JV  | 270  | Insulin-like growth factor-binding protein       | Igfbp5     | NANANA0110   |       |       |       |        |       |       |        |       |       | 1.047 | 0.758 | 0.968 | 1.502  | 0.025 | 0.086 | 0.617 | 0.003 | 0.117 | 0.743  | 0.051 | 0.170 |
| 0 | 1 | 90  | D3ZGK7    | 171  | Carboxylic ester hydrolase                       | Ces1c      | 0000101      | 0.598 | 0.079 | 0.236 | 0.346  | 0.088 | 0.399 | 0.584  | 0.538 | 0.962 | 0.651 | 0.173 | 0.410 | 0.284  | 0.001 | 0.008 | 0.412 | 0.137 | 0.580 | 0.311  | 0.048 | 0.161 |
| 0 | 1 | 42  | AOA0G2JSI | 251  | RCG20603                                         | Serpina3c  | 0000101      | 1.085 | 0.656 | 0.769 | 0.530  | 0.041 | 0.265 | 0.868  | 0.785 | 1.000 | 0.703 | 0.023 | 0.124 | 0.551  | 0.001 | 0.009 | 0.782 | 0.322 | 0.705 | 0.529  | 0.025 | 0.111 |
| 0 | 1 | 42  | P05545    | 99   | Serine protease inhibitor A3K                    | Serpina3k  | 0000101      | 1.085 | 0.656 | 0.769 | 0.530  | 0.041 | 0.265 | 0.868  | 0.785 | 1.000 | 0.703 | 0.023 | 0.124 | 0.551  | 0.001 | 0.009 | 0.782 | 0.322 | 0.705 | 0.528  | 0.025 | 0.111 |
| 1 | 1 | 317 | P20767    | 642  | Ig lambda-2 chain C region                       |            | NANANA01NANA |       |       |       |        |       |       |        |       |       | 1.288 | 0.739 | 0.952 | 5.766  | 0.011 | 0.044 |       |       |       |        |       |       |
| 0 | 1 | 129 | Q62812    | 533  | Myosin-9                                         | Myh9       | NANANA01NANA |       |       |       |        |       |       |        |       |       | 2.216 | 0.268 | 0.554 | 39.501 | 0.001 | 0.006 |       |       |       |        |       |       |
| 1 | 1 | 333 | D4AAY7    | 547  | Phosphatidylinositol glycan anchor biosyn Piga   |            | NANANA01NANA |       |       |       |        |       |       |        |       |       | 1.157 | 0.008 | 0.070 | 0.657  | 0.000 | 0.000 |       |       |       |        |       |       |
| 1 | 1 | 359 | F1LXF5    | 1450 | Guided entry of tail-anchored proteins FatG4     |            | NAO001NANA   |       |       |       | 1.024  | 0.936 | 1.000 | 0.928  | 0.886 | 1.000 | 1.196 | 0.299 | 0.569 | 0.498  | 0.002 | 0.012 |       |       |       |        |       |       |
| 0 | 1 | 145 | P14046    | 166  | Alpha-1-inhibitor 3                              | A1i3       | 0000100      | 1.027 | 0.794 | 0.876 | 0.607  | 0.237 | 0.536 | 0.501  | 0.216 | 0.608 | 1.353 | 0.081 | 0.279 | 0.612  | 0.006 | 0.025 | 1.169 | 0.320 | 0.705 | 1.161  | 0.419 | 0.696 |
| 0 | 0 | 34  | M0RDX2    | 1455 | Amyloid-like protein 2                           | Aplp2      | 0000100      | 1.407 | 0.088 | 0.246 | 4.004  | 0.028 | 0.240 | 0.467  | 0.384 | 0.906 | 0.854 | 0.392 | 0.680 | 0.601  | 0.004 | 0.021 | 1.320 | 0.266 | 0.671 | 1.191  | 0.542 | 0.801 |
| 1 | 1 | 178 | P01015    | 247  | Angiotensinogen                                  | Agt        | 0000100      | 0.960 | 0.926 | 0.962 | 0.305  | 0.037 | 0.265 | 0.640  | 0.770 | 1.000 | 0.699 | 0.222 | 0.480 | 0.224  | 0.000 | 0.003 | 1.122 | 0.796 | 0.963 | 0.523  | 0.290 | 0.550 |
| 1 | 1 | 391 | G3V8D4    | 328  | Apolipoprotein C-II (Predicted)                  | ApoC2      | 0000100      | 0.434 | 0.141 | 0.339 | 2.679  | 0.435 | 0.728 | 0.379  | 0.596 | 0.982 | 0.511 | 0.208 | 0.468 | 2.065  | 0.044 | 0.138 | 0.909 | 0.629 | 0.914 | 0.753  | 0.799 | 1.000 |
| 0 | 0 | 250 | P26644    | 109  | Beta-2-glycoprotein 1                            | ApoH       | 0000100      | 1.286 | 0.119 | 0.304 | 0.918  | 0.941 | 1.000 | 1.767  | 0.626 | 0.988 | 0.649 | 0.099 | 0.312 | 0.553  | 0.015 | 0.057 | 0.848 | 0.571 | 0.858 | 0.940  | 0.842 | 1.000 |
| 0 | 0 | 165 | G3V836    | 42   | Clusterin                                        | Clu        | 0000100      | 1.058 | 0.977 | 0.983 | 0.630  | 0.366 | 0.677 | 0.382  | 0.101 | 0.475 | 0.636 | 0.349 | 0.630 | 0.316  | 0.050 | 0.153 | 1.359 | 0.468 | 0.813 | 0.995  | 0.974 | 1.000 |
| 0 | 0 | 105 | D3ZBS2    | 224  | Inter-alpha-trypsin inhibitor heavy chain I th3  |            | 0000100      | 0.857 | 0.524 | 0.717 | 1.005  | 0.977 | 1.000 | 1.046  | 0.892 | 1.000 | 1.040 | 0.971 | 0.998 | 0.661  | 0.043 | 0.136 | 1.128 | 0.657 | 0.947 | 1.193  | 0.338 | 0.608 |
| 0 | 0 | 35  | P97569    | 205  | Kallistatin                                      |            | 0000100      | 0.495 | 0.153 | 0.357 | 0.530  | 0.267 | 0.587 | 0.439  | 0.437 | 0.948 | 1.511 | 0.119 | 0.337 | 0.270  | 0.000 | 0.003 | 1.396 | 0.391 | 0.760 | 0.744  | 0.355 | 0.627 |
| 0 | 1 | 145 | Q03626    | 182  | Murineoglobulin-1                                | Mug1       | 0000100      | 0.999 | 0.983 | 0.983 | 0.605  | 0.218 | 0.516 | 0.493  | 0.201 | 0.608 | 1.321 | 0.063 | 0.230 | 0.623  | 0.003 | 0.016 | 1.257 | 0.153 | 0.580 | 1.205  | 0.303 | 0.564 |
| 0 | 0 | 164 | P14272    | 62   | Plasma kallikrein                                | Klk1b      | 0000100      | 0.800 | 0.293 | 0.518 | 1.096  | 0.998 | 1.000 | 0.448  | 0.485 | 0.948 | 1.223 | 0.358 | 0.639 | 2.427  | 0.017 | 0.061 | 1.987 | 0.137 | 0.580 | 1.799  | 0.161 | 0.358 |
| 0 | 0 | 363 | G3V8K8    | 787  | Protein Z, vitamin K-dependent plasma gl         | ProZ       | 0000100      | 0.587 | 0.239 | 0.485 | 4.189  | 0.021 | 0.214 | 2.023  | 0.164 | 0.608 | 0.677 | 0.331 | 0.610 | 2.281  | 0.026 | 0.089 | 0.524 | 0.089 | 0.498 | 1.107  | 0.963 | 1.000 |
| 1 | 1 | 370 | D3Z977    | 220  | T-box 19 (Predicted)                             | Tbx19      | 0000100      | 0.689 | 0.467 | 0.675 | 0.849  | 0.862 | 1.000 | 0.852  | 0.589 | 0.980 | 0.513 | 0.148 | 0.370 | 0.328  | 0.010 | 0.041 | 0.525 | 0.768 | 0.963 | 1.018  | 0.647 | 0.933 |
| 1 | 1 | 442 | M0R6K3    | 162  | Proline-rich 32                                  | Prr32      | NANANA0011   |       |       |       |        |       |       |        |       |       | 0.634 | 0.080 | 0.279 | 0.624  | 0.058 | 0.168 | 0.508 | 0.000 | 0.000 | 0.329  | 0.000 | 0.000 |
| 1 | 1 | 406 | D3ZPI8    | 434  | Complement C8 gamma chain                        | C8g        | NAO000011    |       |       |       | 1.027  | 0.857 | 1.000 | 1.355  | 0.956 | 1.000 | 0.901 | 0.947 | 0.998 | 0.566  | 0.737 | 0.848 |       |       |       | 0.127  | 0.011 | 0.083 |
| 1 | 1 | 226 | P49088    | 10   | Asparagine synthetase [glutamine-hydro] Asn      |            | NANANANANA10 |       |       |       |        |       |       |        |       |       |       |       |       |        |       |       | 0.601 | 0.002 | 0.092 | 1.046  | 0.800 | 1.000 |
| 0 | 0 | 330 | AOA0G2JA  | 770  | Neubulette                                       |            | NANANANANA10 |       |       |       |        |       |       |        |       |       |       |       |       |        |       |       | 0.639 | 0.013 | 0.197 | 0.974  | 0.912 | 1.000 |
| 0 | 1 | 313 | P19939    | 943  | Apolipoprotein C-I                               | ApoC1      | 0000010      | 1.299 | 0.337 | 0.548 | 1.307  | 0.431 | 0.728 | 1.501  | 0.176 | 0.608 | 1.478 | 0.096 | 0.312 | 0.785  | 0.396 | 0.593 | 2.188 | 0.007 | 0.189 | 1.482  | 0.178 | 0.386 |
| 1 | 1 | 416 | Q9EQV9    | 245  | Carboxypeptidase B2                              | Cpb2       | 0000010      | 1.312 | 0.296 | 0.518 | 1.482  | 0.323 | 0.620 | 1.244  | 0.750 | 1.000 | 0.826 | 0.562 | 0.855 | 0.724  | 0.510 | 0.678 | 1.662 | 0.011 | 0.197 | 1.369  | 0.077 | 0.213 |
| 0 | 0 | 194 | Q63515    | 472  | C4b-binding protein beta chain                   |            | NANANANANA01 |       |       |       |        |       |       |        |       |       |       |       |       |        |       |       | 0.745 | 0.881 | 0.972 | 2.673  | 0.028 | 0.117 |
| 0 | 0 | 94  | P31394    | 203  | Vitamin K-dependent protein C                    | Proc       | NAO0NANA01   |       |       |       | 7.341  | 0.189 | 0.488 | 11.821 | 0.032 | 0.246 |       |       |       |        |       |       | 1.248 | 0.367 | 0.730 | 1.802  | 0.030 | 0.119 |
| 0 | 1 | 6   | F1LXV6    | 703  | Ig-like domain-containing protein                |            | NAO000001    |       |       |       | 0.797  | 0.182 | 0.488 | 0.843  | 0.397 | 0.925 | 0.605 | 0.079 | 0.279 | 0.670  | 0.094 | 0.245 | 0.498 | 0.026 | 0.277 | 0.306  | 0.002 | 0.031 |
| 0 | 1 | 6   | F1LW00    | 1277 | Ig-like domain-containing protein                |            | NAO000001    |       |       |       | 0.797  | 0.185 | 0.488 | 0.836  | 0.368 | 0.883 | 0.605 | 0.084 | 0.284 | 0.657  | 0.085 | 0.229 | 0.498 | 0.024 | 0.277 | 0.301  | 0.002 | 0.031 |
| 0 | 0 | 57  | Q4KM66    | 353  | LOC500183 protein                                | LOC500183  | NAO000001    |       |       |       | 2.875  | 0.129 | 0.422 | 2.386  | 0.638 | 0.988 | 0.455 | 0.777 | 0.978 | 1.630  | 0.886 | 0.949 | 2.924 | 0.016 | 0.208 | 11.834 | 0.002 | 0.031 |
| 0 | 0 | 2   | Q7TMC7    | 388  | Ab2-417                                          |            | 0000001      | 1.228 | 0.214 | 0.464 | 0.795  | 0.485 | 0.752 | 0.652  | 0.103 | 0.475 | 0.743 | 0.509 | 0.796 | 0.663  | 0.161 | 0.344 | 0.814 | 0.586 | 0.866 | 0.281  | 0.002 | 0.031 |
| 0 | 1 | 192 | Q7TPK2    | 394  | Ac2-120                                          | F5         | 0000001      | 0.688 | 0.172 | 0.382 | 0.340  | 0.013 | 0.214 | 0.734  | 0.506 | 0.948 | 0.670 | 0.868 | 0.998 | 0.534  | 0.240 | 0.432 | 0.703 | 0.164 | 0.580 | 0.492  | 0.012 | 0.083 |
| 0 | 0 | 29  | F1M632    | 241  | Adenylate kinase 9                               | Ak9        | 0000001      | 0.977 | 0.947 | 0.962 | 2.145  | 0.107 | 0.399 | 1.709  | 0.244 | 0.671 | 0.690 | 0.272 | 0.554 | 0.808  | 0.354 | 0.561 | 0.772 | 0.268 | 0.671 | 0.468  | 0.004 | 0.045 |
| 0 | 0 | 22  | P02764    | 239  | Alpha-1-acid glycoprotein                        | Orm1       | 0000001      | 0.209 | 0.107 | 0.284 | 50.332 | 0.099 | 0.399 | 31.508 | 0.108 | 0.475 | 0.481 | 0.181 | 0.418 | 0.712  | 0.248 | 0.432 | 0.286 | 0.085 | 0.492 | 0.120  | 0.015 | 0.087 |
| 0 | 1 | 251 | P02651    | 124  | Apolipoprotein A-IV                              | ApoA4      | 0000001      | 0.658 | 0.074 | 0.236 | 1.034  | 0.921 | 1.000 | 1.253  | 0.541 | 0.962 | 1.168 | 0.690 | 0.936 | 1.419  | 0.252 | 0.432 | 0.635 | 0.163 | 0.580 | 0.362  | 0.004 | 0.045 |
| 0 | 1 | 133 | F1M6Z1    | 346  | Apolipoprotein B-100                             | ApoB       | 0000001      | 0.170 | 0.445 | 0.652 | 2.611  | 0.997 | 1.000 | 1.072  | 0.999 | 1.000 | 1.220 | 0.576 | 0.856 | 0.36   |       |       |       |       |       |        |       |       |
